# Supplementary material for: Lyso-Gb3 associates with adverse long-term outcome in patients with Fabry disease
Source: HighWire-hosted journal article supplement (doi:10.1136/jmedgenet-2020-107338), 2021-01-25
Supplement: jmedgenet-2020-107338supp001_data_supplement.pdf [file jmedgenet-2020-107338supp001_data_supplement.pdf]

Supplementary Table 1. Baseline characteristics.

|                                                 | Classic males | Classic females | Later-Onset males   | Later-Onset females |
|-------------------------------------------------|---------------|-----------------|---------------------|---------------------|
|                                                 | N=21          | N=36            | N=5                 | N=4                 |
| <i>Clinical and biochemical characteristics</i> |               |                 |                     |                     |
| Serum Lyso-Gb3 (ng/ml), median (range)          | 52 (25–118)   | 10 (5.2–27)     | 7.5 (2.0 –17)       | 3.3 (0.8–5.2)       |
| Age (years), median (range)                     | 50 (22–73)    | 44 (23–74)      | 53 (47–74)          | 49 (39–79)          |
| On ERT, n (%)                                   | 21 (100)      | 24 (67)         | 4 (80) <sup>1</sup> | 1 (25)              |
| <b>Mutation Type:</b>                           |               |                 |                     |                     |
| Missense, n (%)                                 | 13 (61)       | 21 (58)         | 5 (100)             | 4 (100)             |
| Deletions, n (%)                                | 5 (24)        | 6 (16)          | 0 (0)               | 0 (0)               |
| Nonsense, n (%)                                 | 0 (0)         | 2 (6)           | 0 (0)               | 0 (0)               |
| Duplication, n (%)                              | 1 (5)         | 5 (14)          | 0 (0)               | 0 (0)               |
| Splicing mutation, n (%)                        | 2 (10)        | 2 (6)           | 0 (0)               | 0 (0)               |

| <i>Early-onset signs and symptoms</i>                                 |               |             |             |             |
|-----------------------------------------------------------------------|---------------|-------------|-------------|-------------|
| Neuropathic pain, n (%)                                               | 20 (95)       | 25 (69)     | 0 (0)       | 0 (0)       |
| Hypohidrosis, n (%)                                                   | 21 (100)      | 10 (28)     | 0 (0)       | 0 (0)       |
| Angiokeratoma, n (%)                                                  | 17 (81)       | 9 (25)      | 0 (0)       | 0 (0)       |
| Cornea verticillata, n (%)                                            | 18 (86)       | 27 (75)     | 0 (0)       | 0 (0)       |
| <i>Later-onset disease complications</i>                              |               |             |             |             |
| Kidney                                                                |               |             |             |             |
| Serum creatinine ( $\mu\text{mol/l}$ ), median (range)                | 150 (69–1181) | 68 (43–97)  | 98 (90–233) | 64 (55–110) |
| Urine protein/creatinine ratio <sup>2</sup> (mg/mmol), median (range) | 28 (7–256)    | 9 (bld–256) | 48 (7–178)  | 5 (bld–57)  |
| On RRT <sup>3</sup> , n (%)                                           | 7 (33)        | 0 (0)       | 0 (0)       | 0 (0)       |
| Heart                                                                 |               |             |             |             |

|                                           |              |             |              |             |
|-------------------------------------------|--------------|-------------|--------------|-------------|
| LVMMI (g/m <sup>2</sup> ), median (range) | 105 (49–299) | 73 (42–199) | 105 (49–186) | 64 (39–114) |
|-------------------------------------------|--------------|-------------|--------------|-------------|

#### Brain

|                          |        |        |        |       |
|--------------------------|--------|--------|--------|-------|
| History of stroke, n (%) | 3 (14) | 6 (17) | 1 (20) | 0 (0) |
|--------------------------|--------|--------|--------|-------|

<sup>1</sup> One patient was untreated due to malcompliance.

<sup>2</sup> Patients on renal replacement were excluded from this analysis

<sup>3</sup> Chronic dialysis: n=2; kidney transplant: n=5

Abbreviations: bld, below limit of detection; LVMMI, left ventricular myocardial mass index; NT-proBNP, N-terminal pro brain natriuretic peptide; RRT, renal replacement therapy.

Supplementary Table 2. Detailed baseline demographical and biochemical characteristics.

### A. Classic Males

| Age | GLA Mutation                          | Predicted Enzyme Protein Change                    | Serum Lyso-Gb3 Level (ng/ml) |
|-----|---------------------------------------|----------------------------------------------------|------------------------------|
| 56  | Deletion exon 2<br>(g2962, g5871)     |                                                    | 115.0                        |
| 29  | c.125T>C                              | p.M42T                                             | 39.0                         |
| 41  | c.125T>C                              | p.M42T                                             | 35.3                         |
| 42  | c.370-2A>G<br>( <u>IVS2-2A&gt;G</u> ) | Functional null allele due to splice site mutation | 36.8                         |
| 50  | c.370-2A>G<br>( <u>IVS2-2A&gt;G</u> ) | Functional null allele due to splice site mutation | 57.6                         |
| 60  | c.581C>T                              | p.T194I                                            | 41.0                         |
| 73  | c.581C>T                              | p.T194I                                            | 46.1                         |
| 57  | c.581C>T                              | p.T194I                                            | 40.0                         |
| 42  | c.581C>T                              | p.T194I                                            | 40.4                         |

|    |                   |                 |       |
|----|-------------------|-----------------|-------|
| 34 | c.679C>T          | p.R227X         | 57.5  |
| 22 | c.744_745delTA    | p.F248LfsX7     | 95.5  |
| 50 | c.744_745delTA    | p.F248LfsX8     | 92.2  |
| 54 | c.744_745delTA    | p.F248LfsX8     | 74.8  |
| 45 | c.827G>A          | p.S276N         | 45.6  |
| 61 | c.899T>A          | p.L300H         | 83.0  |
| 59 | c.899T>A          | p.L300H         | 40.1  |
| 45 | c.1033T>C         | p.S345P         | 24.7  |
| 65 | c.1033T>C         | p.S345P         | 52.3  |
| 60 | c.1033T>C         | p.S345P         | 55.2  |
| 35 | c.1055_1057dupCTA | p.A352_M353insT | 71.7  |
| 33 | c.1147_1149delTTC | p.F383del       | 118.0 |

### B. Classic Females

| Age | GLA Mutation | Predicted Enzyme Protein Change | Serum Lyso-Gb3 Level (ng/ml) |
|-----|--------------|---------------------------------|------------------------------|
| 54  | c.72G>A      | p.W24X                          | 13.5                         |
| 44  | c.125T>C     | p.M42T                          | 7.3                          |
| 35  | c.125T>C     | p.M42T                          | 7.5                          |
| 31  | c.125T>C     | p.M42T                          | 8.6                          |
| 37  | c.125T>C     | p.M42T                          | 8.0                          |

|    |                                       |                                                             |      |
|----|---------------------------------------|-------------------------------------------------------------|------|
| 42 | c.154T>C                              | p.C52R                                                      | 5.9  |
| 54 | c.365delA                             | p.N122IfsX8                                                 | 23.1 |
| 71 | c.370-2A>G<br>( <u>IVS2-2A&gt;G</u> ) | Functional null<br>allele due to<br>splice site<br>mutation | 14.4 |
| 69 | c.514T>C                              | p.C172R                                                     | 9.3  |
| 74 | c.581C>T                              | p.T194I                                                     | 26.8 |
| 40 | c.581C>T                              | p.T194I                                                     | 8.3  |
| 71 | c.581C>T                              | p.T194I                                                     | 17.8 |
| 38 | c.581C>T                              | p.T194I                                                     | 6.1  |
| 45 | c.581C>T                              | p.T194I                                                     | 10.1 |
| 69 | c.581C>T                              | p.T194I                                                     | 12.0 |
| 43 | c.581C>T                              | p.T194I                                                     | 9.7  |
| 47 | c.640-3C>G<br>( <u>IVS4-3C&gt;G</u> ) | Functional null<br>allele due to<br>splice site<br>mutation | 10.0 |
| 35 | c.704C>A                              | p.S235Y                                                     | 8.2  |
| 26 | c.744_745delTA                        | p.F248LfsX7                                                 | 7.9  |
| 45 | c.744_745delTA                        | p.F248LfsX7                                                 | 5.2  |

|    |                   |                 |      |
|----|-------------------|-----------------|------|
| 70 | c.744_745delTA    | p.F248LfsX7     | 8.6  |
| 62 | c.796G>T          | p.D266T         | 8.9  |
| 61 | c.796G>T          | p.D266T         | 15.9 |
| 42 | c.901C>T          | p.R301X         | 10.7 |
| 48 | c.1033T>C         | p.S345P         | 7.8  |
| 57 | c.1033T>C         | p.S345P         | 16.5 |
| 34 | c.1033T>C         | p.S345P         | 13.6 |
| 29 | c.1033T>C         | p.S345P         | 7.0  |
| 31 | c.1055_1057dupCTA | p.A352_M353insT | 10.6 |
| 31 | c.1147_1149delTTC | p.F383del       | 7.2  |
| 41 | c.1167dupT        | p.V390CfsX9     | 23.6 |
| 57 | c.1167dupT        | p.V390CfsX9     | 9.9  |
| 23 | c.1167dupT        | p.V390CfsX9     | 10.1 |
| 74 | c.1167dupT        | p.V390CfsX9     | 16.1 |
| 30 | c.1167dupT        | p.V390CfsX9     | 7.6  |
| 36 | c.1235_1236delCT  | p.N122fsX8      | 12.6 |

### C. Later-Onset Males

| Age | GLA Mutation | Predicted Enzyme Protein Change | Serum Lyso-Gb3 Level (ng/ml) |
|-----|--------------|---------------------------------|------------------------------|
| 53  | c.613C>T     | p.P205S                         | 17.2                         |

|    |           |         |      |
|----|-----------|---------|------|
| 69 | c.644A>G  | p.N215S | 5.3  |
| 51 | c.902G>A  | p.R301Q | 7.5  |
| 74 | c.902G>A  | p.R301Q | 11.5 |
| 47 | c.1196G>C | p.W399S | 2.0  |

**D. Later-Onset Females**

| Age | GLA Mutation | Predicted Enzyme Protein Change | Serum Lyso-Gb3 Level (ng/ml) |
|-----|--------------|---------------------------------|------------------------------|
| 39  | c.337T>C     | p.F113L                         | 1.6                          |
| 54  | c.870G>C     | p.M290I                         | 0.8                          |
| 43  | c.902G>A     | p.R301Q                         | 5.2                          |
| 79  | c.902G>A     | p.R301Q                         | 4.9                          |



Supplementary Table 3. Detailed summary of clinical events occurred during the observational period.

| <b>Event</b>                              | <b>Number of patients suffering the first event</b> | <b>Number of events</b> |
|-------------------------------------------|-----------------------------------------------------|-------------------------|
| <b>Pacemaker and/or ICD implantation*</b> | 7                                                   | 7                       |
| <b>New-onset of Atrial fibrillation</b>   | 3                                                   | 3                       |
| <b>kidney transplantation</b>             | 1                                                   | 1                       |
| <b>chronic dialysis requirement</b>       | 1                                                   | 1                       |
| <b>stroke</b>                             | 1                                                   | 3                       |
| <b>myocardial infarction</b>              | 1                                                   | 1                       |
| <b>death</b>                              | 5                                                   | 5                       |
|                                           | Total 19                                            | Total 21                |

\* Due to:

- high-degree atrioventricular block: n=3
- primary prophylaxis in high-degree myocardial hypertrophy and fibrosis: n=4

Supplementary Figure 1. Time to first complication in Fabry patients according to age (A), sex (B) and phenotype (C).\*

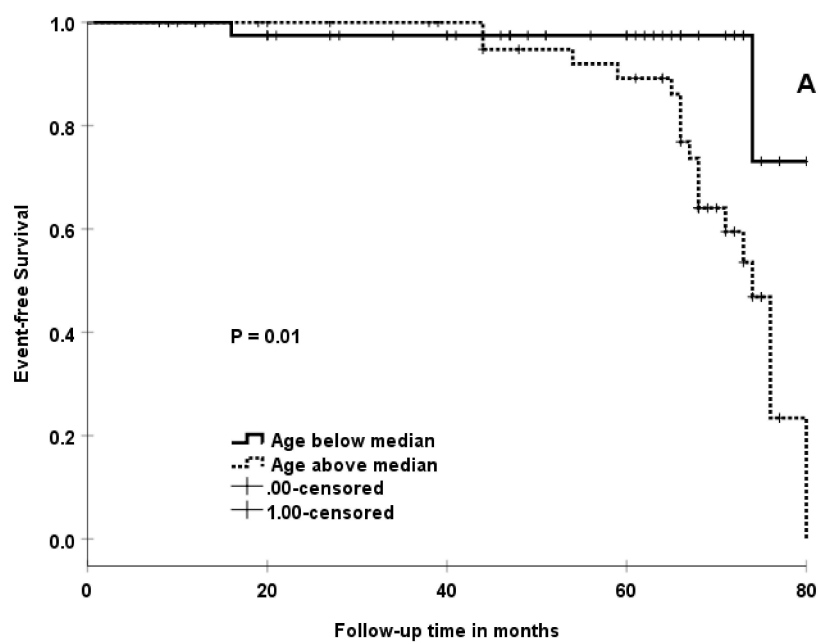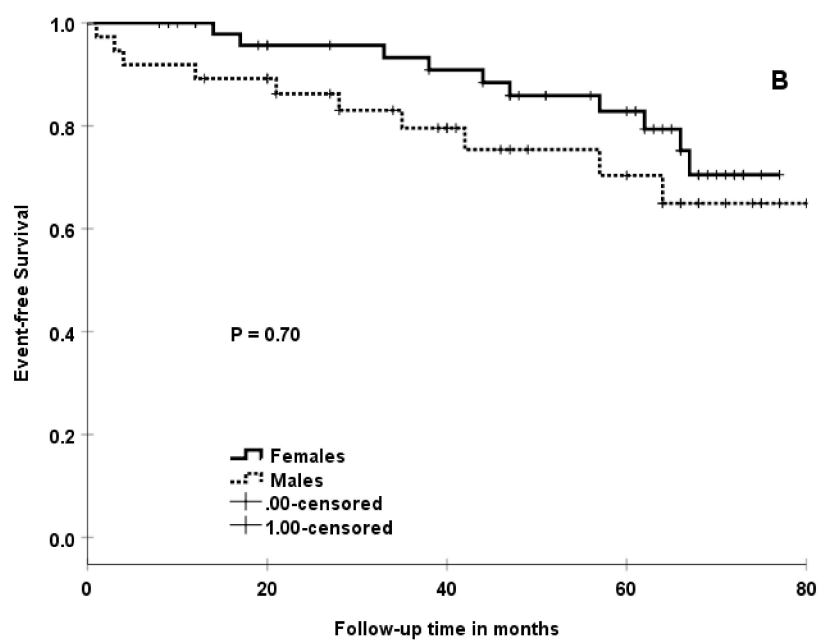

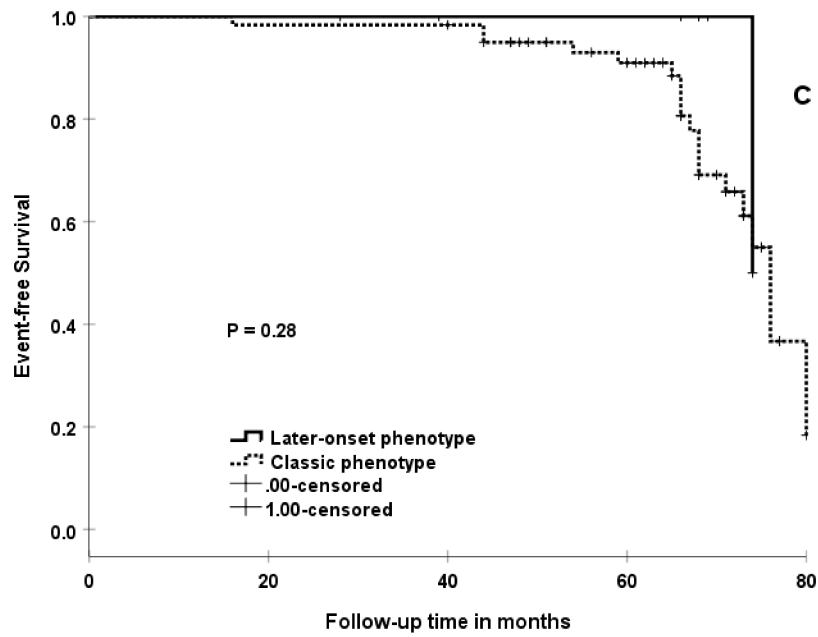

\*The diagram shows the results of Kaplan-Meier analysis and log-rank test of survival distributions equality.
